# Supplementary material
Source: Springer Nature journal article supplement (https://www.springermedizin.de/resource/supplementary/12998_2013_148_MOESM3_ESM.pdf/9680164)
Supplement: MOESM3 [file 9680164]

## Literature Search Strategy

- MedLine/PubMed, CINHAL, Index to Chiropractic Literature

2577 articles recovered

## Screening to Meet Inclusion Criteria and Remove Duplicates

(performed by research assistants)

- Peer-reviewed English language literature
- Human diagnostic studies
- Original data
- Intent to determine site of care
- Examiners were health professionals/students
- For validity, subjects had some abnormality/complaint

2293 articles  
excluded

284 articles sent to pairs of reviewers

## Scoring against QUADAS and QAREL Checklists

(performed by pairs of reviewers)

- Reviewers identified articles which on did not appear to meet inclusion criteria

100 articles  
excluded

184 Articles sent for evaluation by full review group

17 new articles nominated by reviewers in course  
of project and approved by at least 2 reviewers

**Total of 201 articles evaluated by full review group**
